# Supplementary material for: Morphological and physiological changes induced by contact-dependent interaction between Candida albicans and Fusobacterium nucleatum
Source: PubMed Central journal article supplement (PMC4906402; doi:10.1038/srep27956), 2016-06-14
Supplement: srep27956-s1.pdf [file srep27956-s1.pdf]

## Supplementary Information for

### Morphological and physiological changes induced by contact-dependent interaction between *Candida albicans* and *Fusobacterium nucleatum*

Batbileg Bor, Lujia Cen, Melissa Agnello, Wenyuan Shi<sup>§</sup> and Xuesong He<sup>§</sup>

<sup>§</sup>Corresponding authors

Email: [xhe@ucla.edu](mailto:xhe@ucla.edu), [wshi@dentistry.ucla.edu](mailto:wshi@dentistry.ucla.edu)

This document contains: Supplementary Figures: Fig. S1-S2

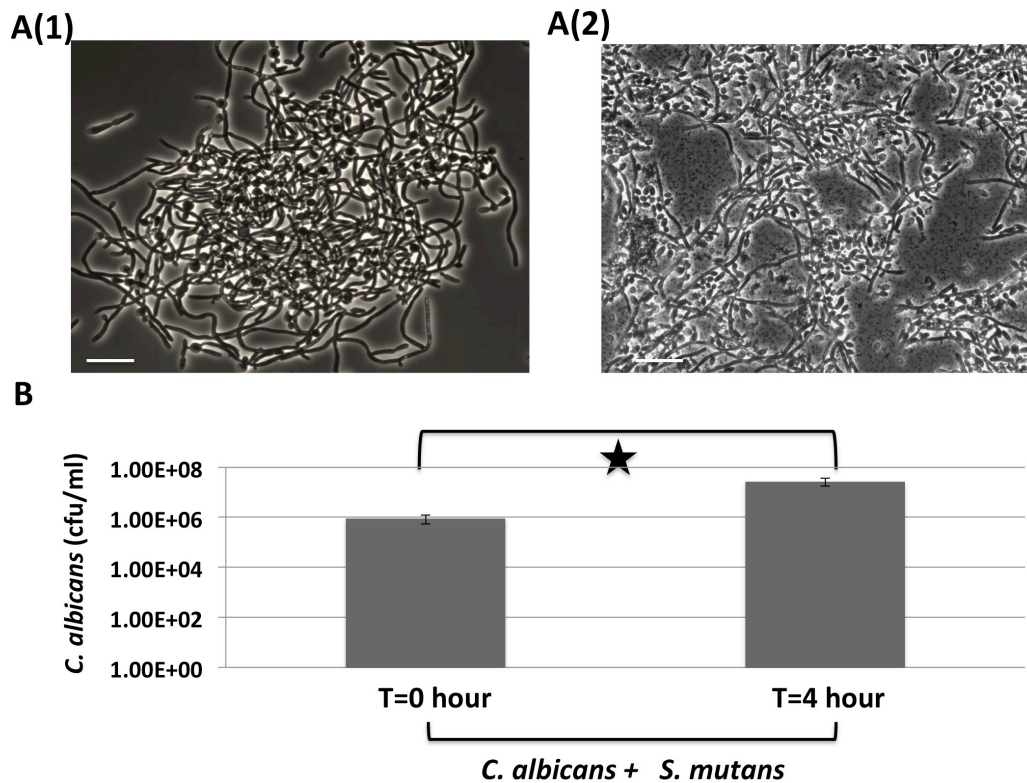

Fig. S-1. **Co-cultivation of *C. albicans* with *S. mutans*.** *C. albicans* was cultured with *S. mutans* in YPD medium supplemented with 20% FBS at 37°C under aerobic conditions for 4 hrs. (A) Samples were taken 4 hours after cultivation and visualized under the microscope. At least 10 images were taken for each sample and only representative images are shown. (B) *C. albicans* viability was monitored as described in Materials and Methods before and after co-cultivation. A star indicates P<0.05. The scale bar is 10  $\mu$ m.

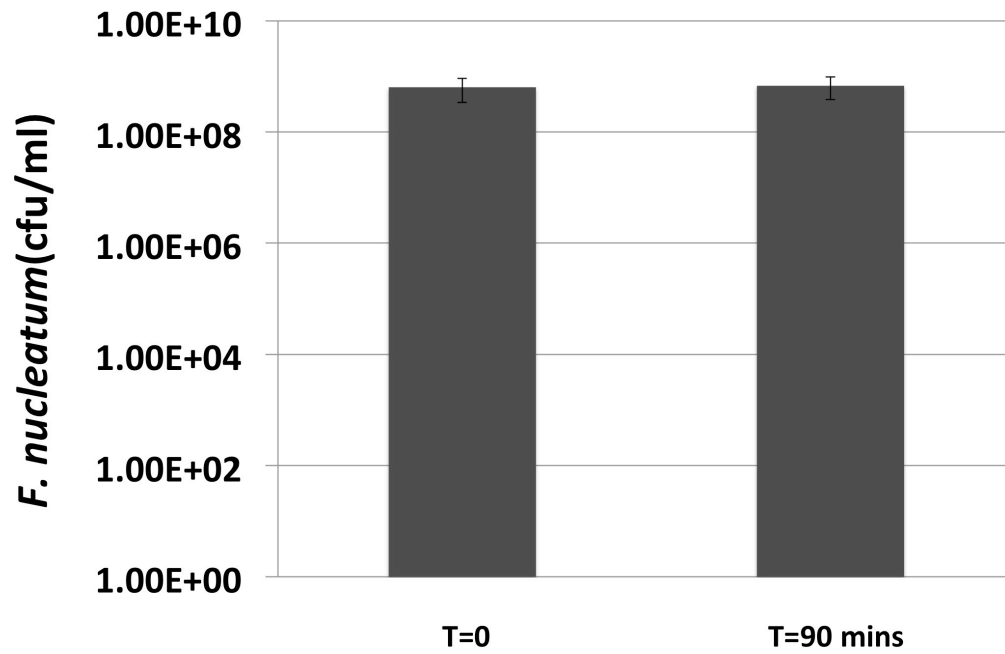

Fig. S-2: **Viability of *F. nucleatum***. RAW macrophage cells were challenged with co-culture of *F. nucleatum* and *C. albicans* as described in Materials and Methods. Viability of *F. nucleatum* was monitored before and 90-minutes after incubation.
